# Supplementary material for: An R2 Indicator and Decomposition Based Steady-State Evolutionary Algorithm for Many-Objective Optimization
Source: Hindawi journal article supplement (doi:10.1155/2018/1435463), 2018-01-01
Supplement: f1 [file 1435463.f1.pdf]

# Supplementary Materials for

## An R2 Indicator and Decomposition Based Steady-state Evolutionary Algorithm for Many-objective Optimization

Fei Li\*, Jianchang Liu, Peiqiu Huang, Huaitao Shi

correspondence to: [lanceleneu@126.com](mailto:lanceleneu@126.com)

### This file includes:

Figures S1 to S5: In order to validate the experimental results, the supplementary material gives the obtained 15-objective approximation Pareto front. The distribution of the approximation Pareto front depends on the distribution of reference vector and the geometry of the Pareto front.

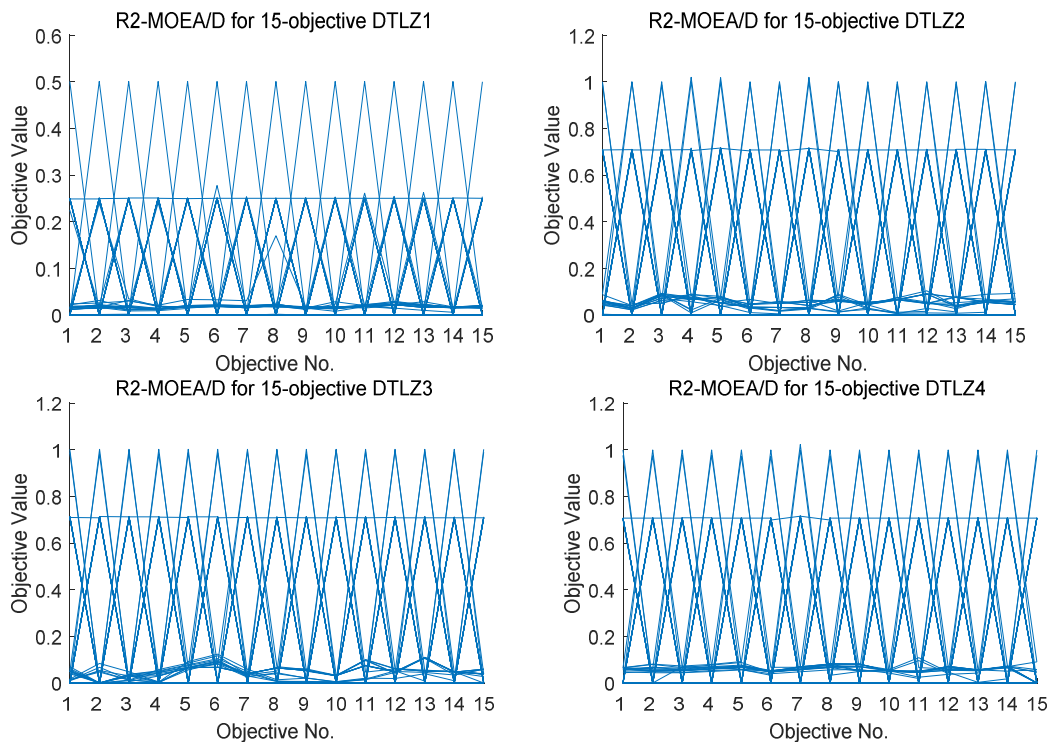

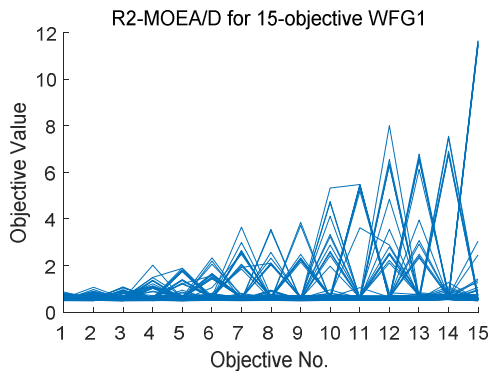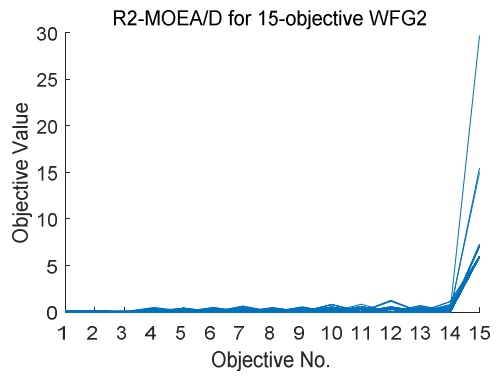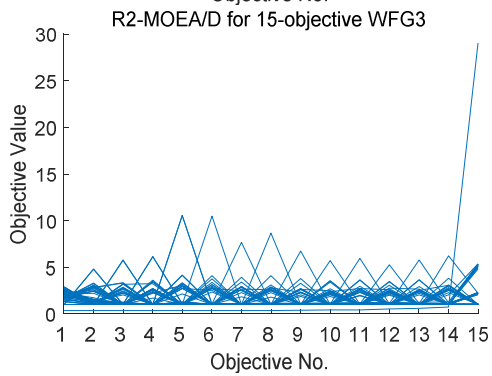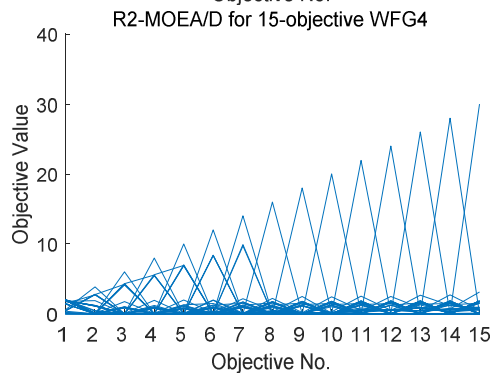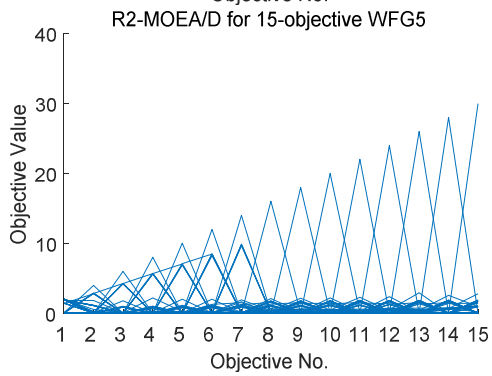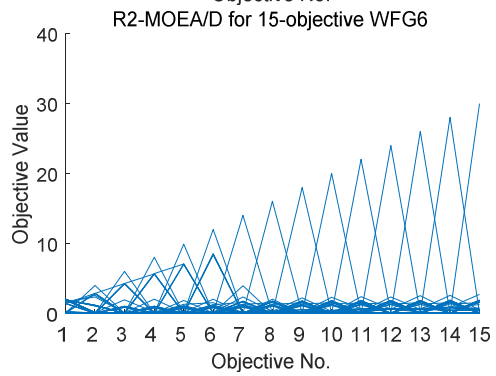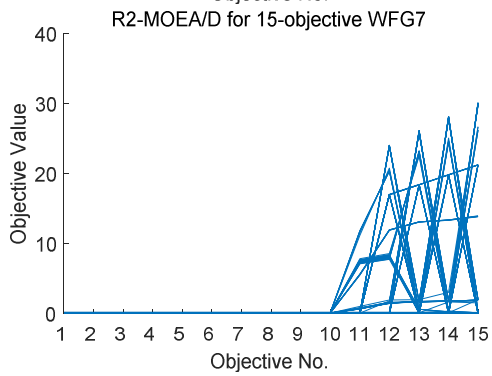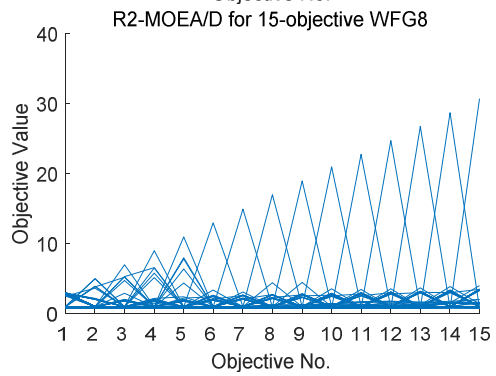

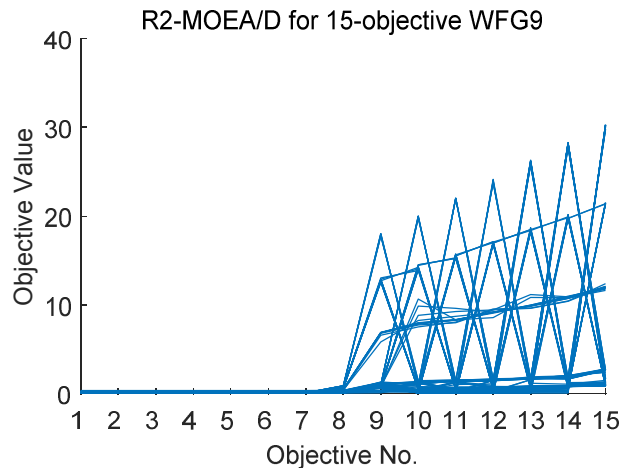

Figure S1. R2-MOEA/D for the 15-objective DTLZ and WFG test instances

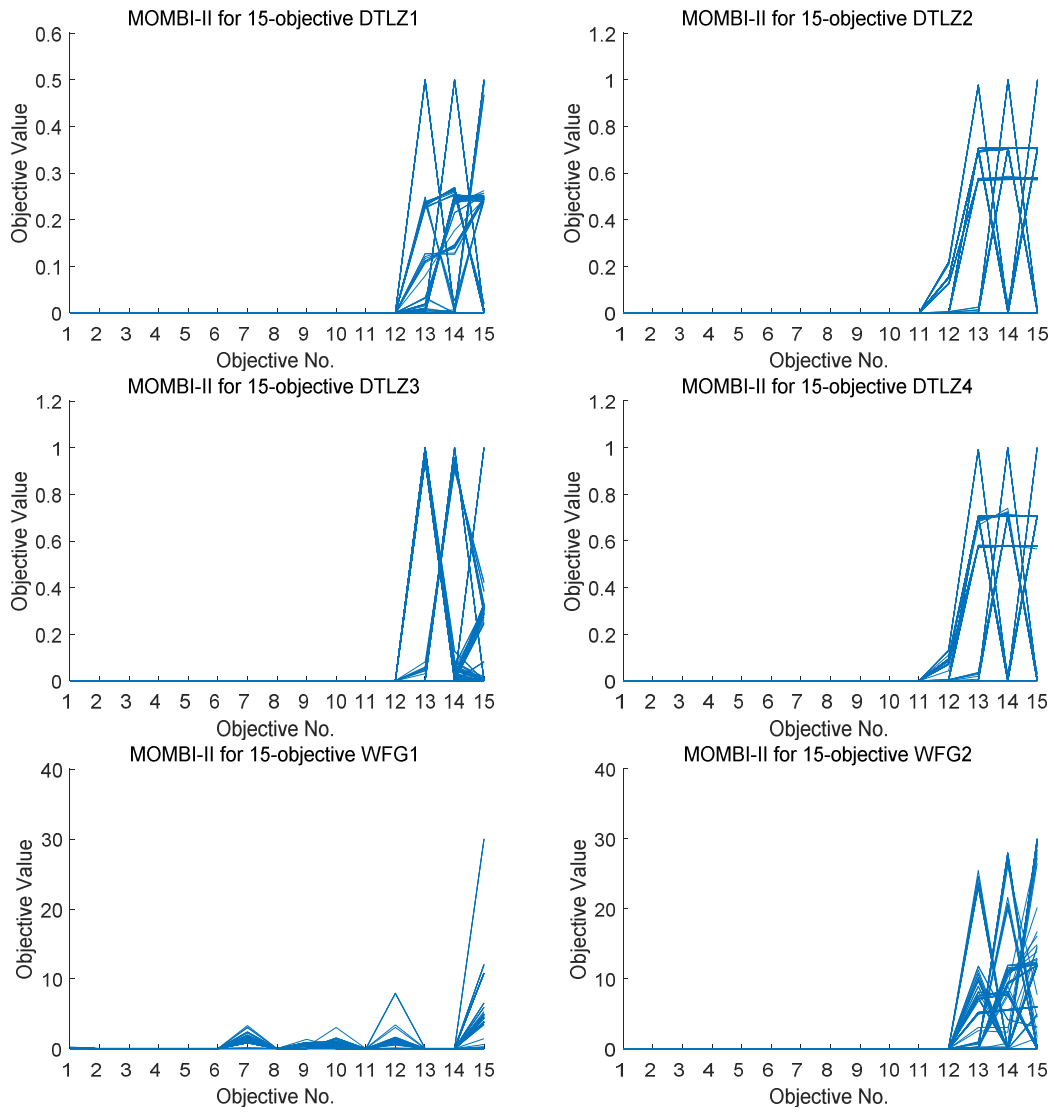

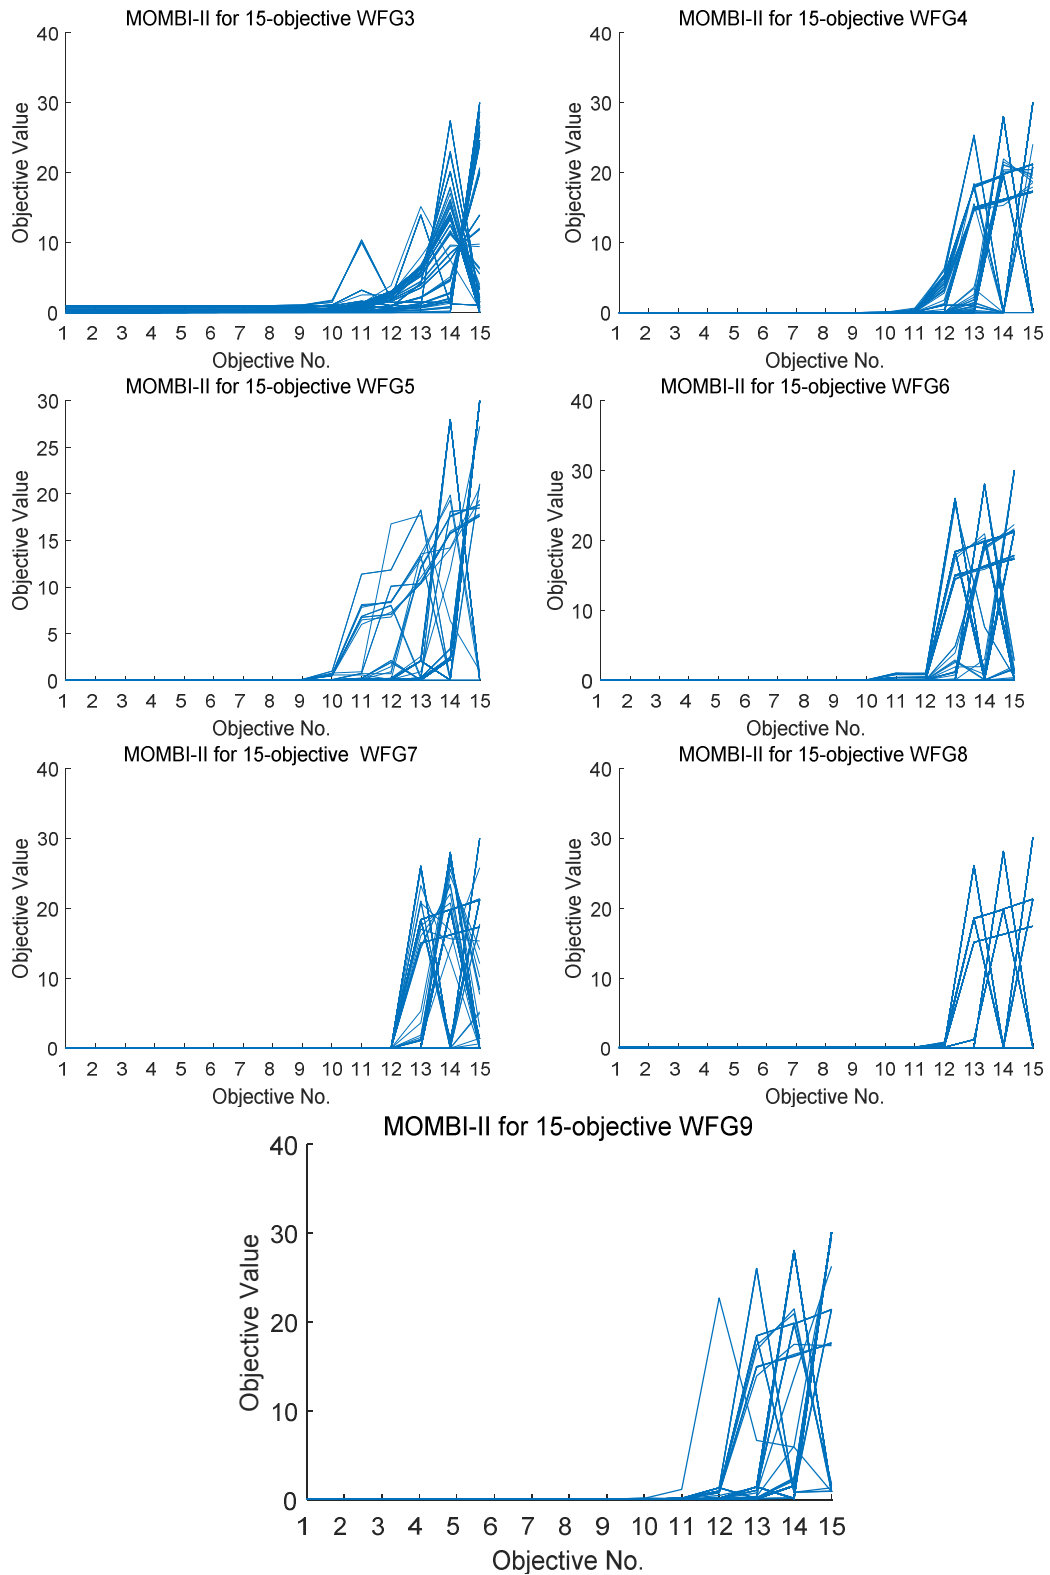

Figure S2. MOMBI-II for the 15-objective DTLZ and WFG test instances

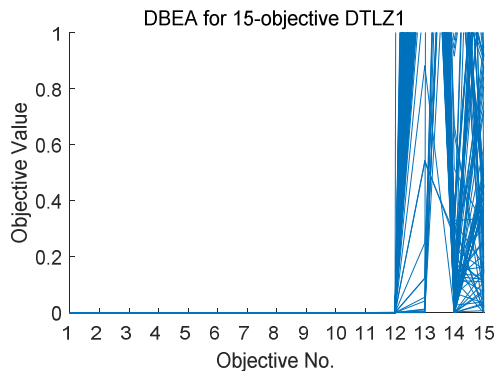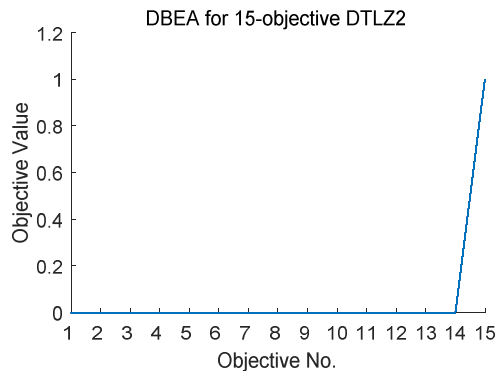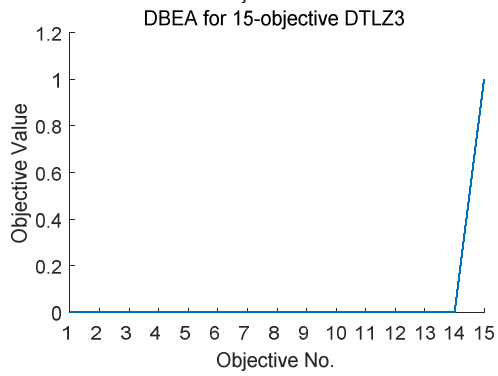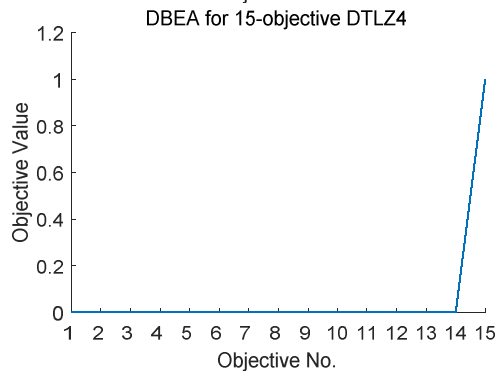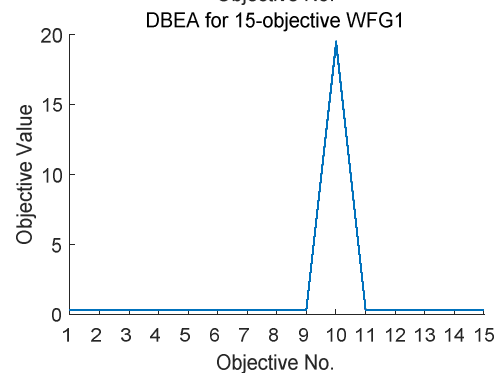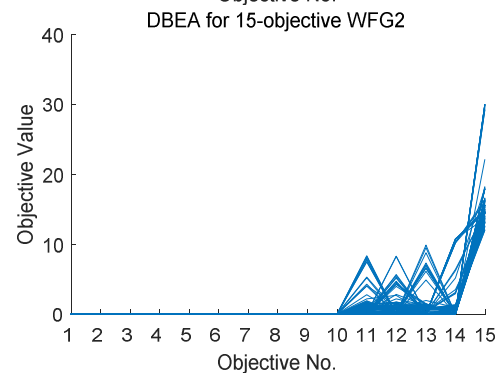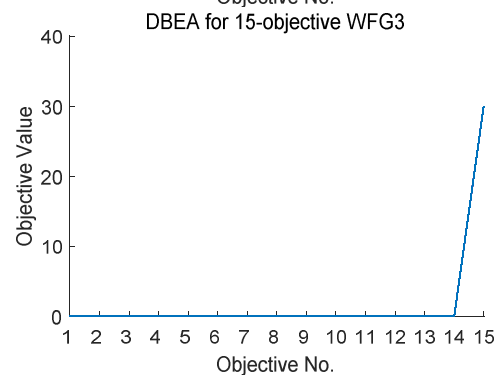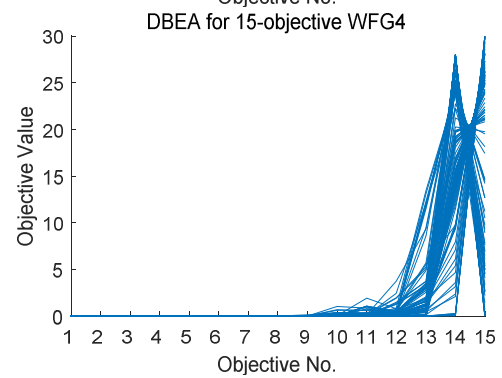

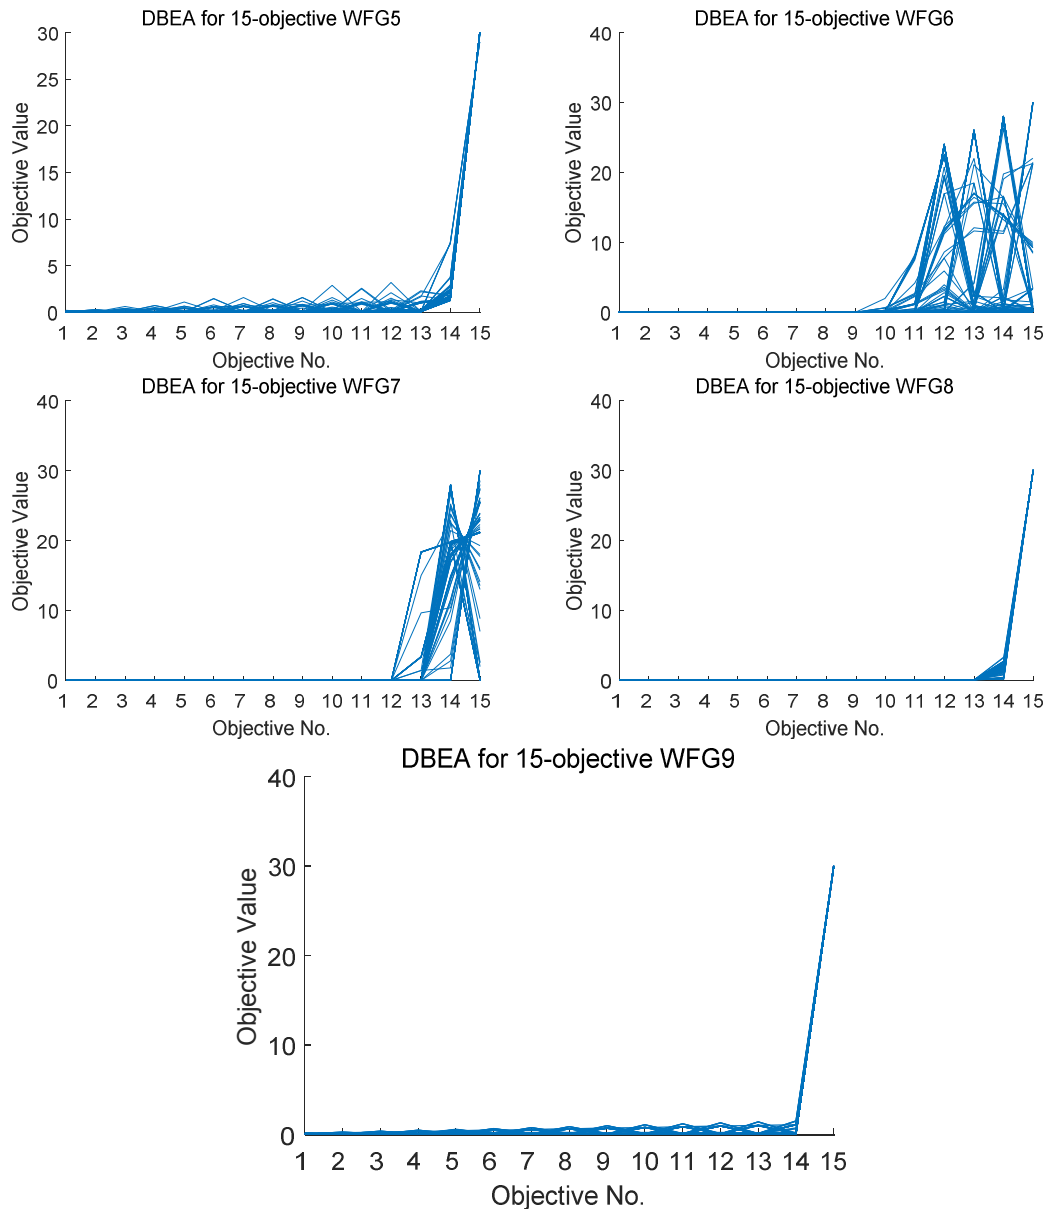

Figure S3. DBEA for the 15-objective DTLZ and WFG test instances

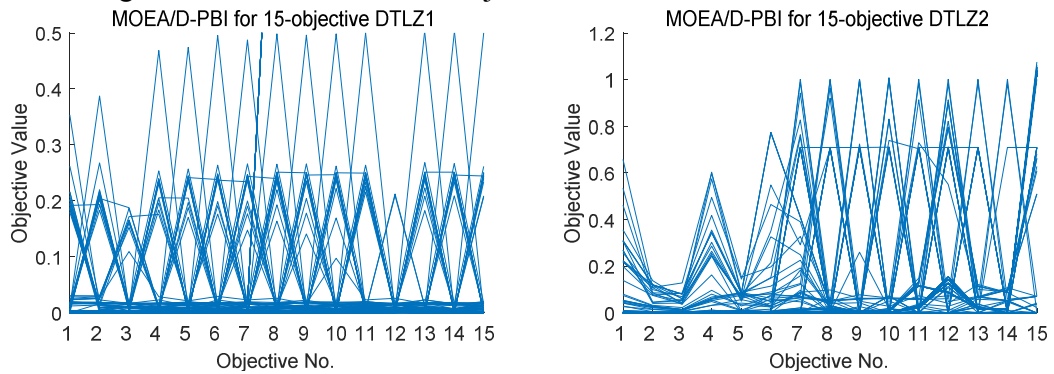

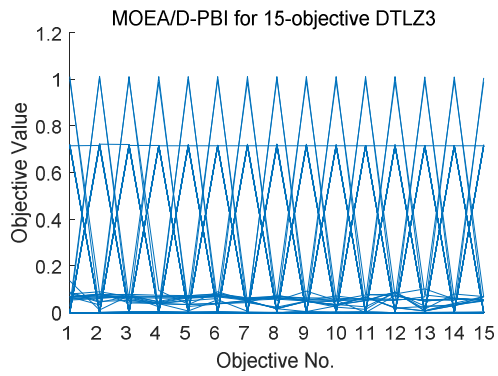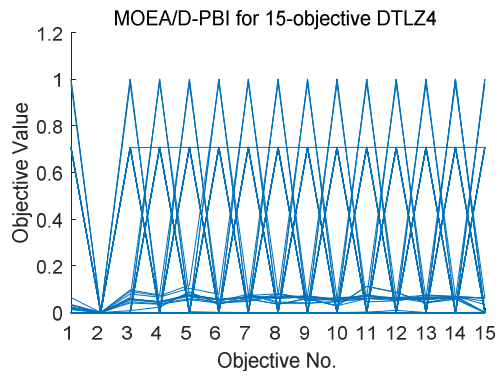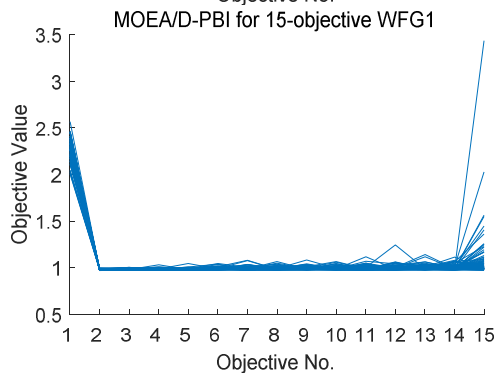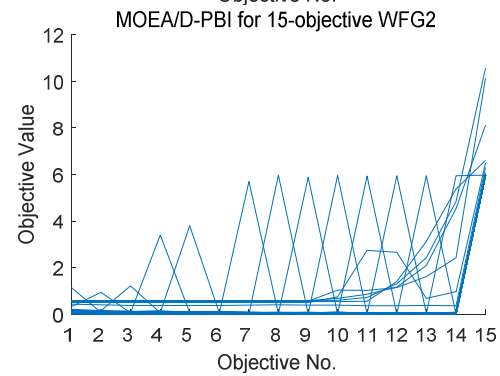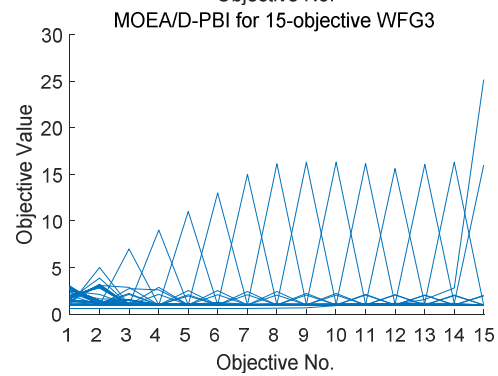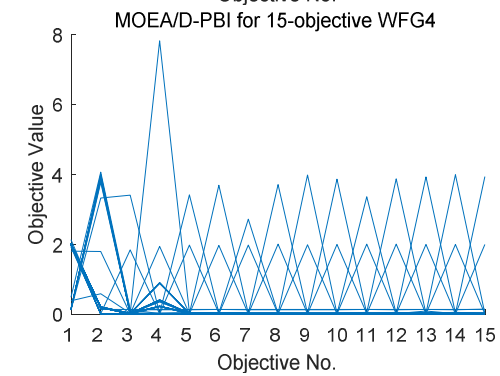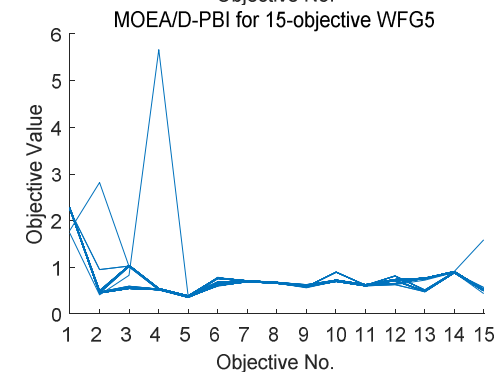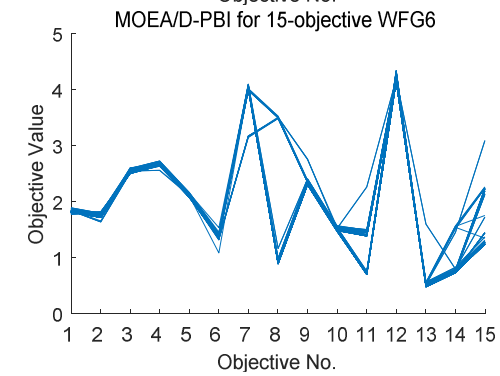

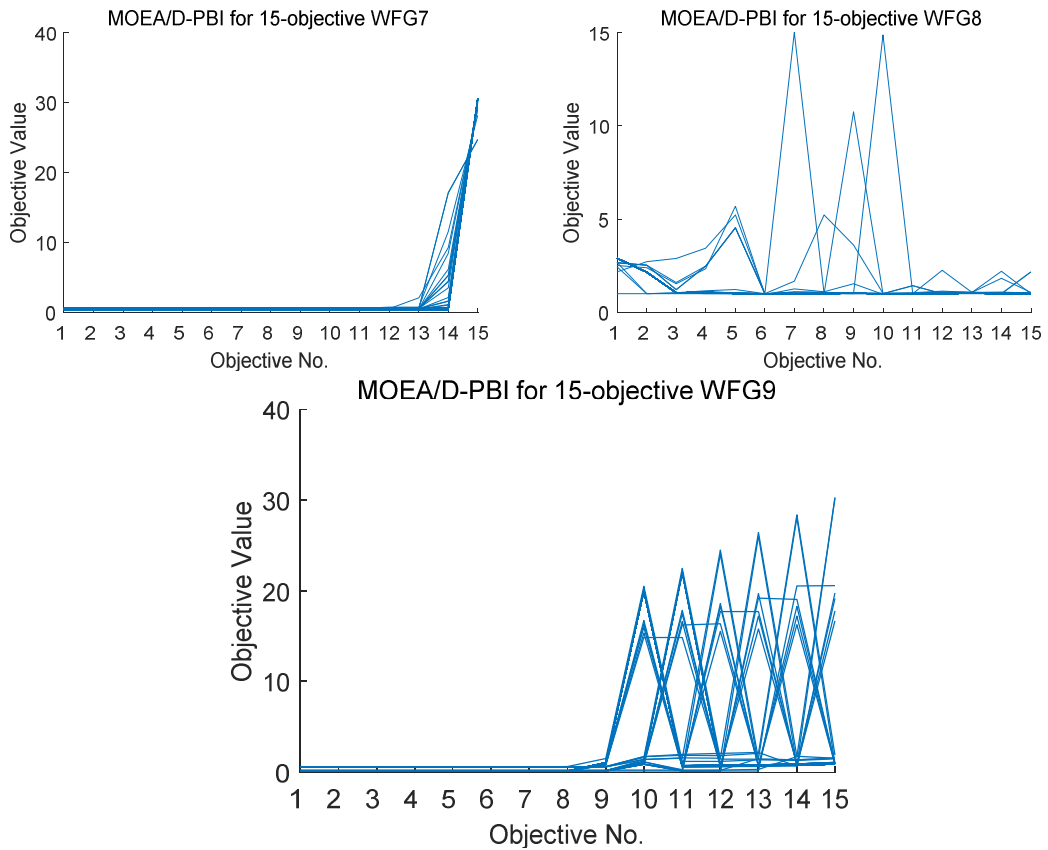

Figure S4. MOEA/D-PBI for the 15-objective DTLZ and WFG test instances

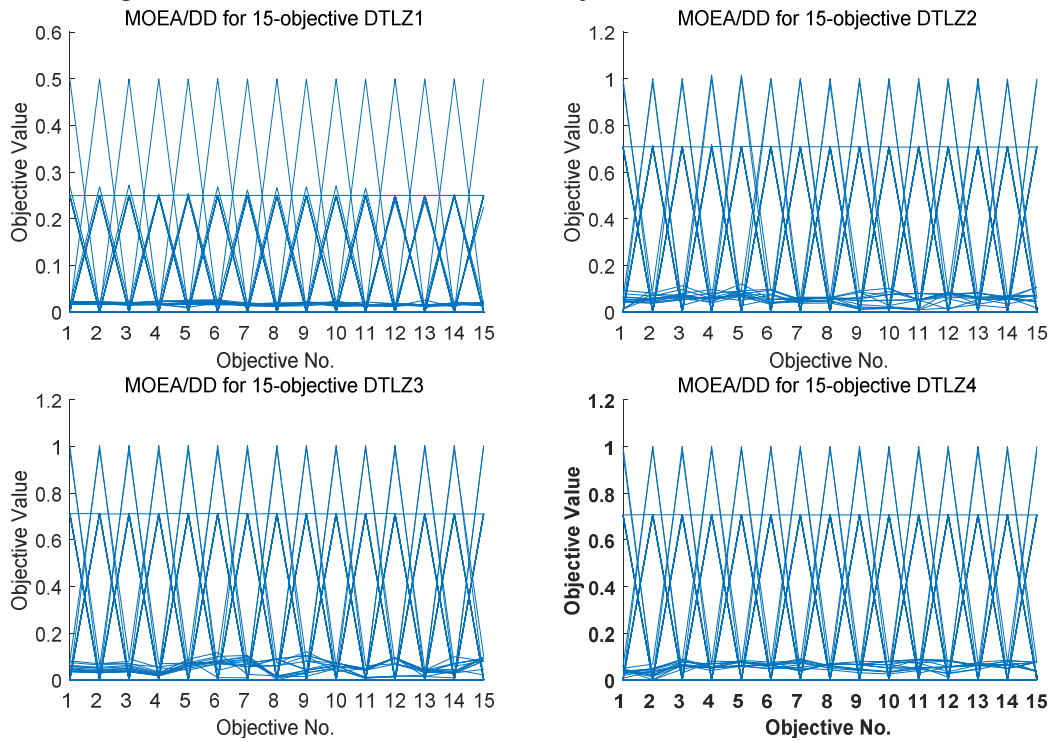



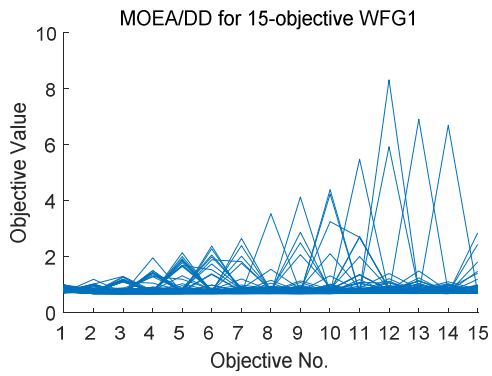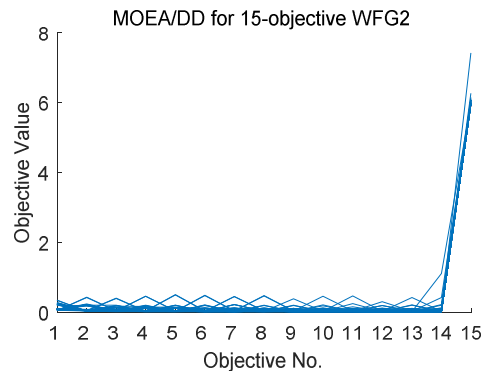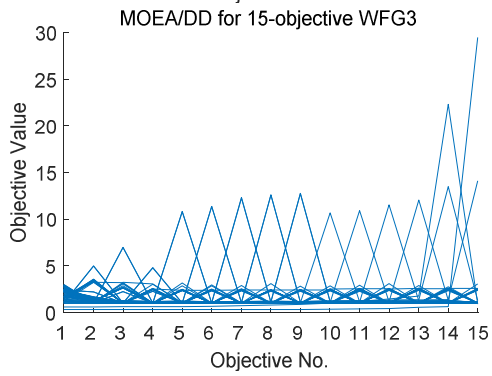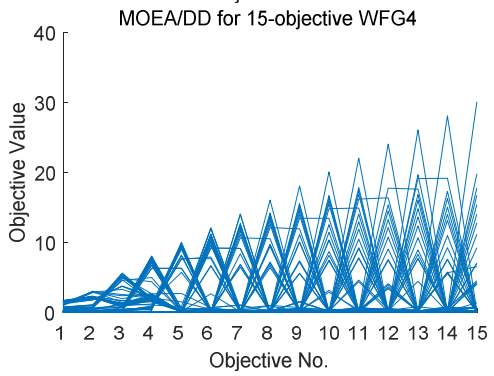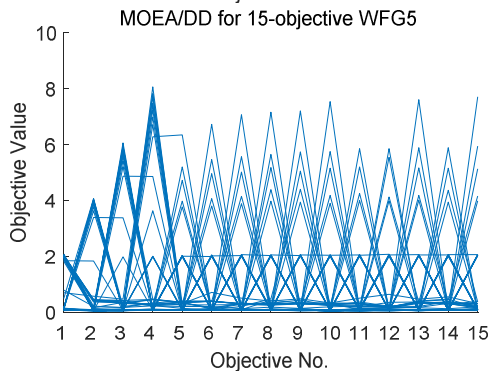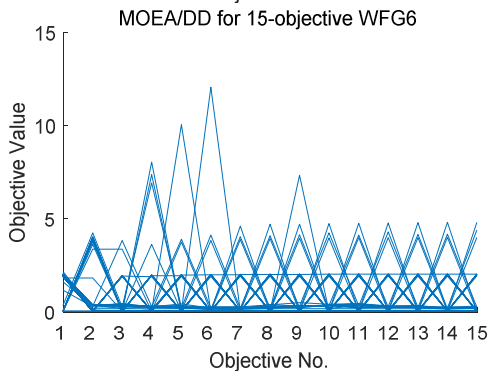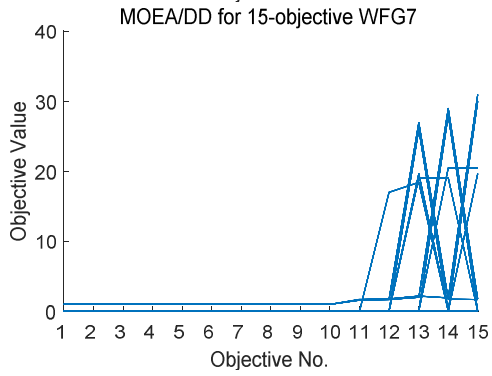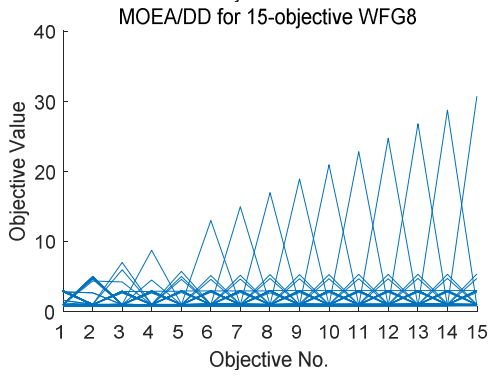

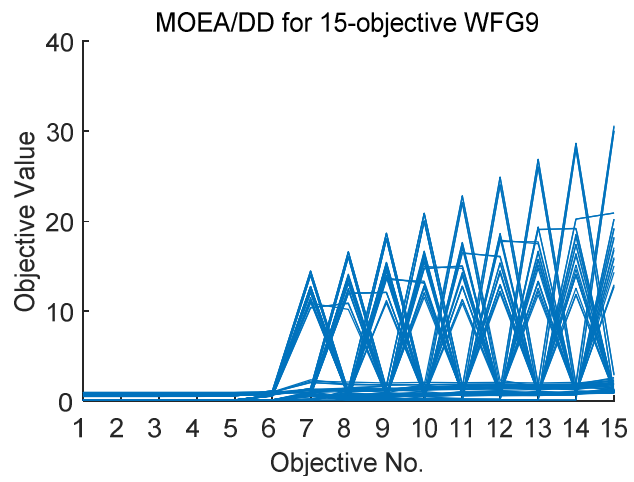

Figure S5. MOEA/DD for the 15-objective DTLZ and WFG test instances
